# Supplementary material for: Design, Synthesis and Fungicidal Activities of Some Novel Pyrazole Derivatives
Source: PubMed Central journal article supplement (PMC6271163; doi:10.3390/molecules190914036), 2014-09-08
Supplement: molecules-19-14036-s001.pdf [file molecules-19-14036-s001.pdf]

# Supplementary Materials

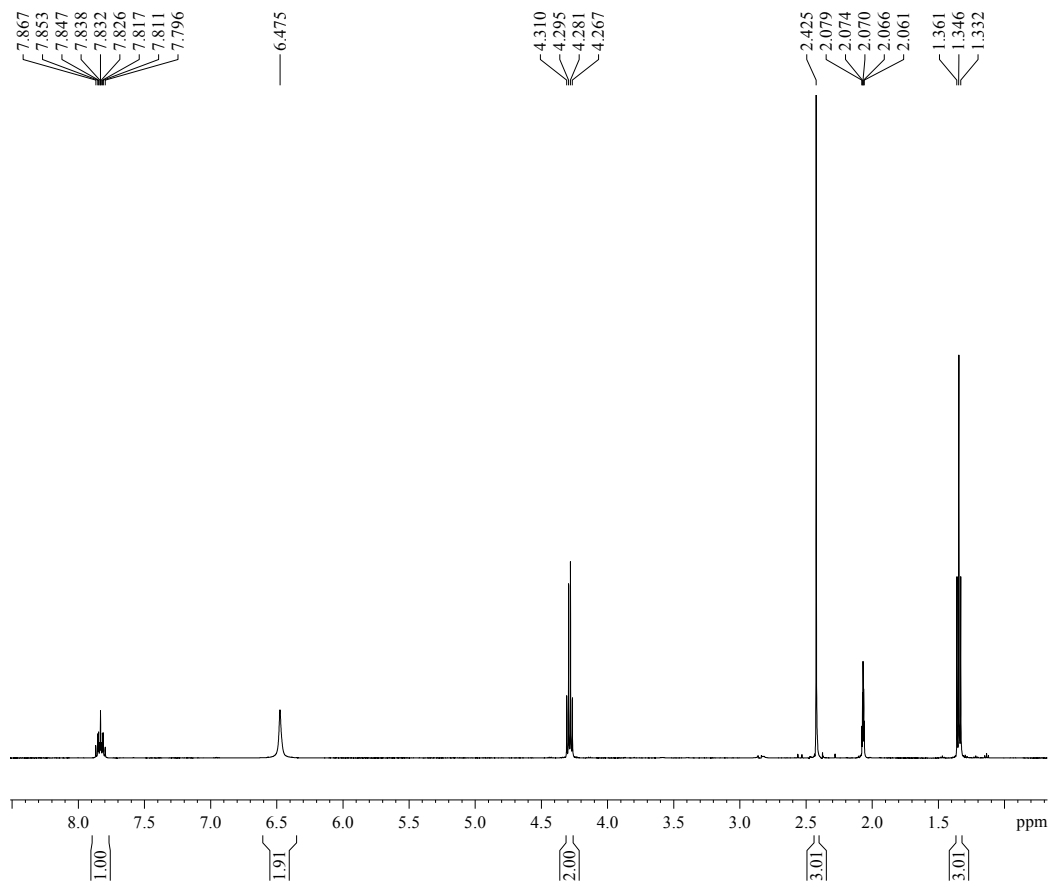

Compound 01 <sup>1</sup>H-NMR

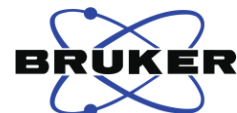

Current Data Parameters  
 NAME ZX-20140324-LXR-78  
 EXPNO 10  
 PROCNO 1

F2 - Acquisition Parameters  
 Date\_ 20140324  
 Time 10.32  
 INSTRUM spect  
 PROBHD 5 mm PABBO BB-  
 PULPROG zg30  
 TD 65536  
 SOLVENT Acetone  
 NS 16  
 DS 2  
 SWH 10330.578 Hz  
 FIDRES 0.157632 Hz  
 AQ 3.1719923 sec  
 RG 144  
 DW 48.400 usec  
 DE 6.50 usec  
 TE 296.4 K  
 D1 1.00000000 sec  
 TD0 1

===== CHANNEL f1 =====  
 NUC1 1H  
 P1 9.00 usec  
 PL1 0 dB  
 PL1W -1 #IND0000 W  
 SFO1 500.1330885 MHz

F2 - Processing parameters  
 SI 32768  
 SF 500.1299998 MHz  
 WDW EM  
 SSB 0  
 LB 0.30 Hz  
 GB 0  
 PC 1.00

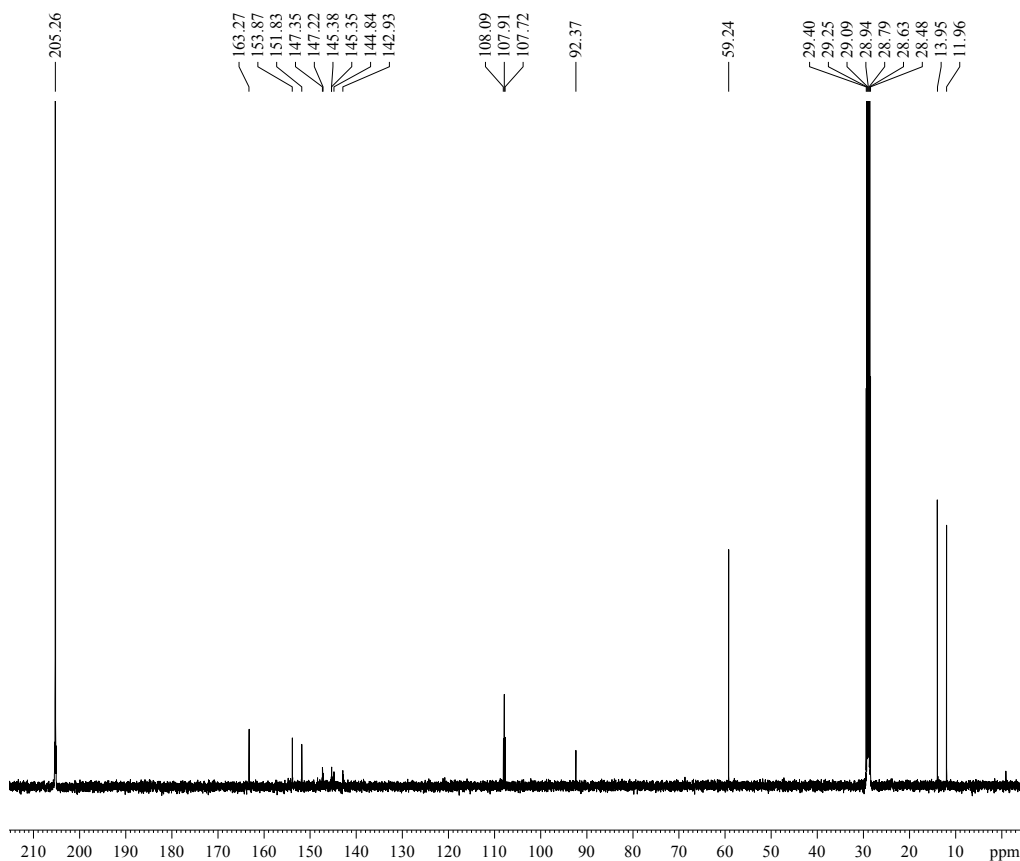

Compound 01 <sup>13</sup>C-NMR

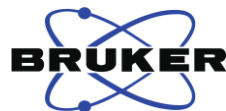

Current Data Parameters  
 NAME ZX-20140324-LXR-78  
 EXPNO 11  
 PROCNO 1

F2 - Acquisition Parameters  
 Date\_ 20140324  
 Time 10.34  
 INSTRUM spect  
 PROBHD 5 mm PABBO BB-  
 PULPROG zgpg30  
 TD 65536  
 SOLVENT Acetone  
 NS 516  
 DS 4  
 SWH 29761.904 Hz  
 FIDRES 0.454131 Hz  
 AQ 1.1010548 sec  
 RG 203  
 DW 16.800 usec  
 DE 6.50 usec  
 TE 297.1 K  
 D1 0.60000002 sec  
 D11 0.03000000 sec  
 TD0 1

===== CHANNEL f1 =====  
 NUC1 13C  
 P1 9.50 usec  
 PL1 -1.00 dB  
 PL1W -1 #IND0000 W  
 SFO1 125.7703643 MHz

===== CHANNEL f2 =====  
 CPDPRG2 waltz16  
 NUC2 1H  
 PCPD2 80.00 usec  
 PL2 0 dB  
 PL12 16.05 dB  
 PL13 17.00 dB  
 PL2W -1 #IND0000 W  
 PL12W -1 #IND0000 W  
 PL13W -1 #IND0000 W  
 SFO2 500.1320005 MHz

F2 - Processing parameters  
 SI 32768  
 SF 125.7577890 MHz  
 WDW EM  
 SSB 0  
 LB 1.00 Hz  
 GB 0  
 PC 1.40

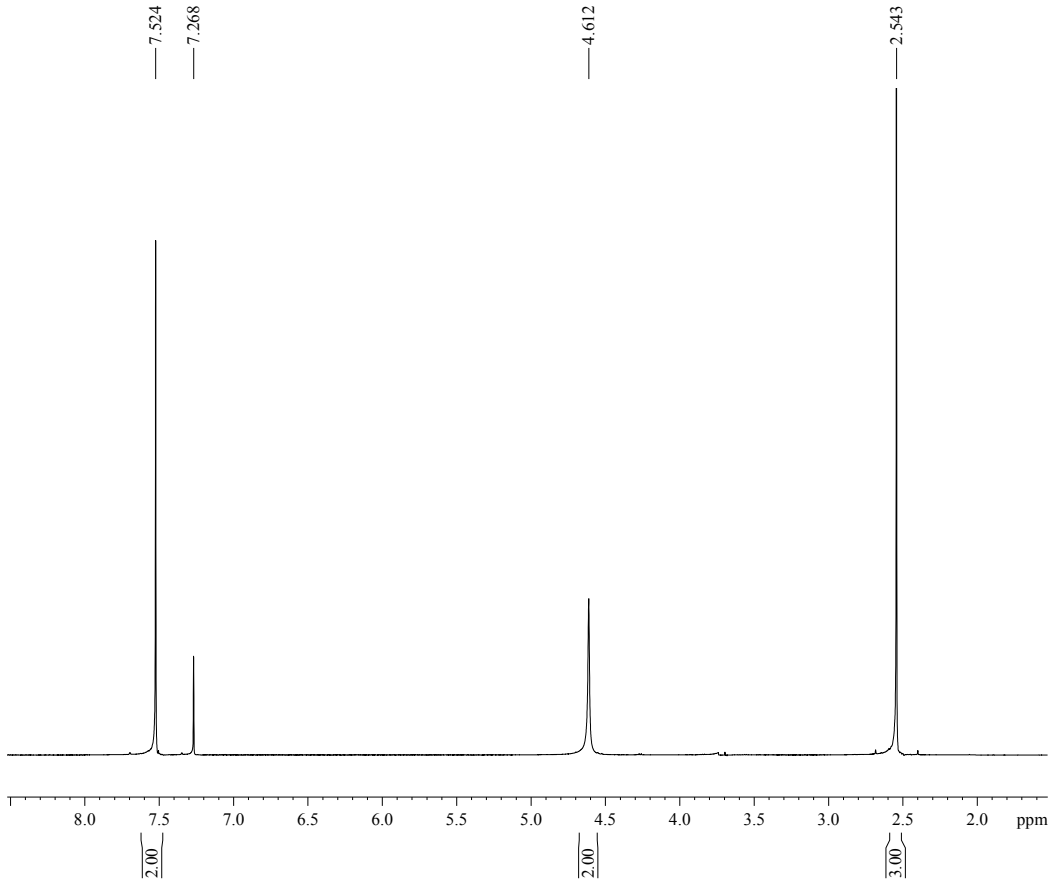Compound 06 <sup>1</sup>H-NMR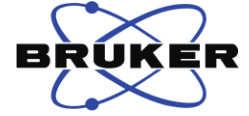

Current Data Parameters  
NAME ZX-20140617-LXR-006  
EXPNO 10  
PROCNO 1

F2 - Acquisition Parameters  
Date\_ 20140617  
Time 16.48  
INSTRUM spect  
PROBHD 5 mm PABBO BB-  
PULPROG zg30  
TD 65536  
SOLVENT CDCl3  
NS 10  
DS 2  
SWH 10330.578 Hz  
FIDRES 0.157632 Hz  
AQ 3.1719923 sec  
RG 144  
DW 48.400 usec  
DE 6.50 usec  
TE 300.1 K  
D1 1.00000000 sec  
TD0 1

===== CHANNEL f1 =====  
NUC1 1H  
P1 9.00 usec  
PL1 0 dB  
PL1W -1.#IND0000 W  
SFO1 500.1330885 MHz

F2 - Processing parameters  
SI 32768  
SF 500.1300190 MHz  
WDW EM  
SSB 0  
LB 0.30 Hz  
GB 0  
PC 1.00

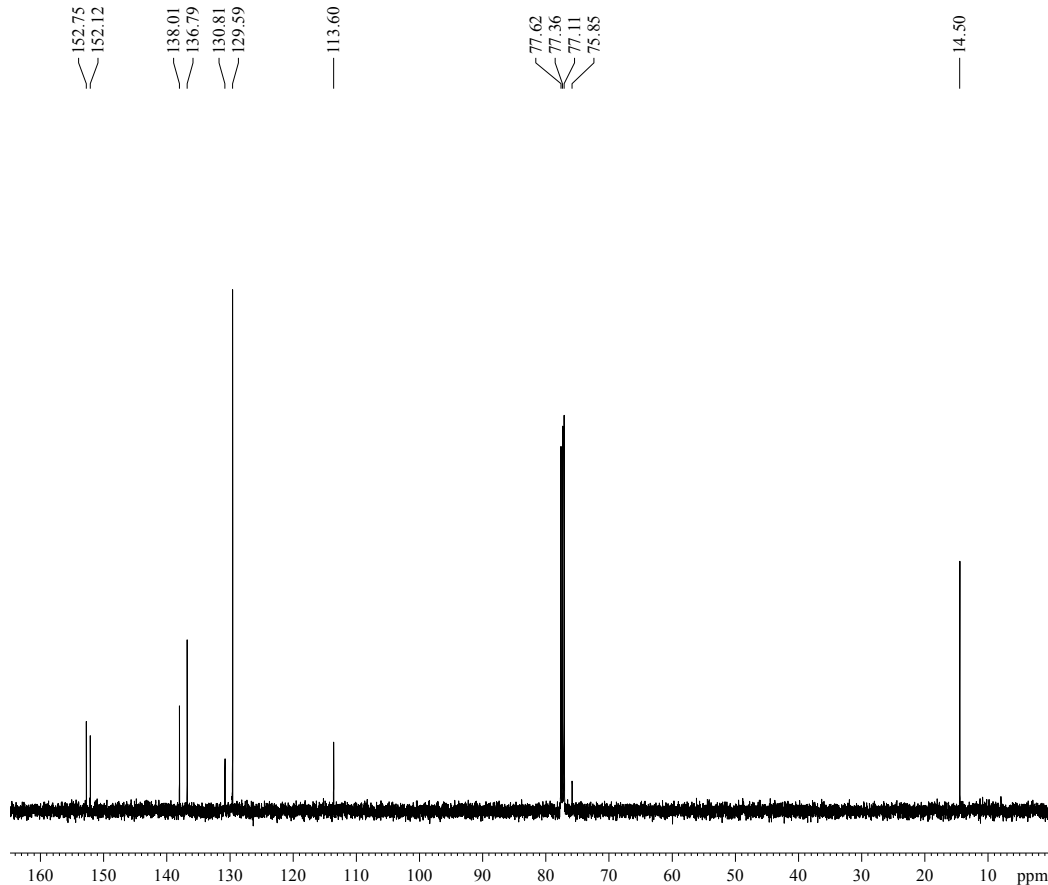Compound 06 <sup>13</sup>C-NMR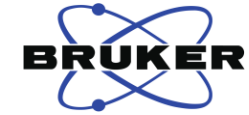

Current Data Parameters  
NAME ZX-20140617-LXR-006  
EXPNO 12  
PROCNO 1

F2 - Acquisition Parameters  
Date\_ 20140617  
Time 16.50  
INSTRUM spect  
PROBHD 5 mm PABBO BB-  
PULPROG zgpg30  
TD 65536  
SOLVENT CDCl3  
NS 85  
DS 4  
SWH 29761.904 Hz  
FIDRES 0.454131 Hz  
AQ 1.1010548 sec  
RG 203  
DW 16.800 usec  
DE 6.50 usec  
TE 300.5 K  
D1 0.60000002 sec  
D11 0.03000000 sec  
TD0 1

===== CHANNEL f1 =====  
NUC1 13C  
P1 9.50 usec  
PL1 -1.00 dB  
PL1W -1.#IND0000 W  
SFO1 125.7703643 MHz

===== CHANNEL f2 =====  
CPDPRG2 waltz16  
NUC2 1H  
PCPD2 80.00 usec  
PL2 0 dB  
PL12 16.05 dB  
PL13 17.00 dB  
PL2W -1.#IND0000 W  
PL12W -1.#IND0000 W  
PL13W -1.#IND0000 W  
SFO2 500.1320005 MHz

F2 - Processing parameters  
SI 32768  
SF 125.7577516 MHz  
WDW EM  
SSB 0  
LB 1.00 Hz  
GB 0  
PC 1.40

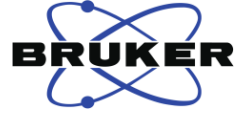

Current Data Parameters  
 NAME ZX-0118-LXR-55  
 EXPNO 10  
 PROCNO 1

F2 - Acquisition Parameters  
 Date\_ 20140118  
 Time 13.35  
 INSTRUM spect  
 PROBHD 5 mm PABBO BB-  
 PULPROG zg30  
 TD 65536  
 SOLVENT DMSO  
 NS 16  
 DS 2  
 SWH 10330.578 Hz  
 FIDRES 0.157632 Hz  
 AQ 3.1719923 sec  
 RG 128  
 DW 48.400 usec  
 DE 6.50 usec  
 TE 297.5 K  
 D1 1.00000000 sec  
 TD0 1

===== CHANNEL f1 =====  
 NUC1 1H  
 P1 9.00 usec  
 PL1 0 dB  
 PL1W -1.#IND0000 W  
 SFO1 500.1330885 MHz

F2 - Processing parameters  
 SI 32768  
 SF 500.1299846 MHz  
 WDW EM  
 SSB 0  
 LB 0.30 Hz  
 GB 0  
 PC 1.00

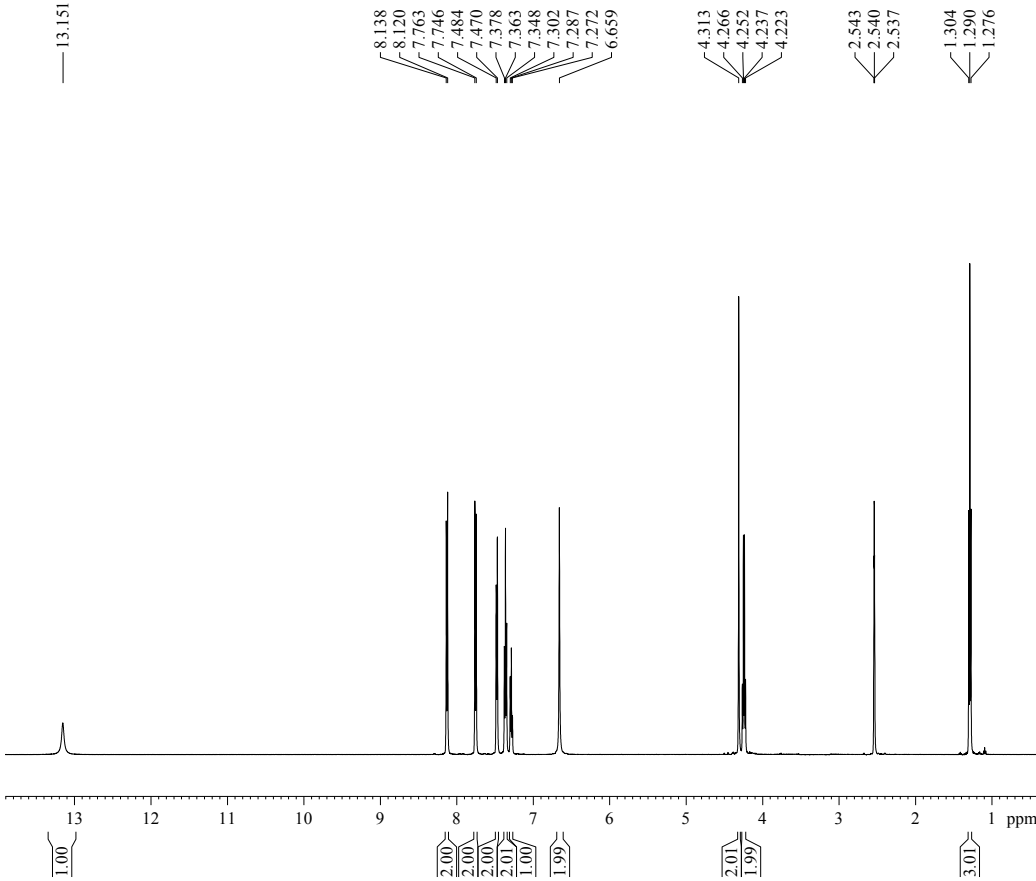

Compound 10 <sup>1</sup>H-NMR

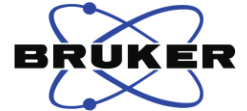

Current Data Parameters  
 NAME ZX-0118-LXR-55  
 EXPNO 11  
 PROCNO 1

F2 - Acquisition Parameters  
 Date\_ 20140118  
 Time 13.46  
 INSTRUM spect  
 PROBHD 5 mm PABBO BB-  
 PULPROG zgpg30  
 TD 65536  
 SOLVENT DMSO  
 NS 320  
 DS 4  
 SWH 29761.904 Hz  
 FIDRES 0.454131 Hz  
 AQ 1.1010548 sec  
 RG 203  
 DW 16.800 usec  
 DE 6.50 usec  
 TE 298.5 K  
 D1 0.60000002 sec  
 D11 0.03000000 sec  
 TD0 1

===== CHANNEL f1 =====  
 NUC1 13C  
 P1 9.50 usec  
 PL1 -1.00 dB  
 PL1W -1.#IND0000 W  
 SFO1 125.7703643 MHz

===== CHANNEL f2 =====  
 CPDPRG2 waltz16  
 NUC2 1H  
 PCPD2 80.00 usec  
 PL2 0 dB  
 PL12 16.05 dB  
 PL13 17.00 dB  
 PL2W -1.#IND0000 W  
 PL12W -1.#IND0000 W  
 PL13W -1.#IND0000 W  
 SFO2 500.1320005 MHz

F2 - Processing parameters  
 SI 32768  
 SF 125.7577328 MHz  
 WDW EM  
 SSB 0  
 LB 1.00 Hz  
 GB 0  
 PC 1.40

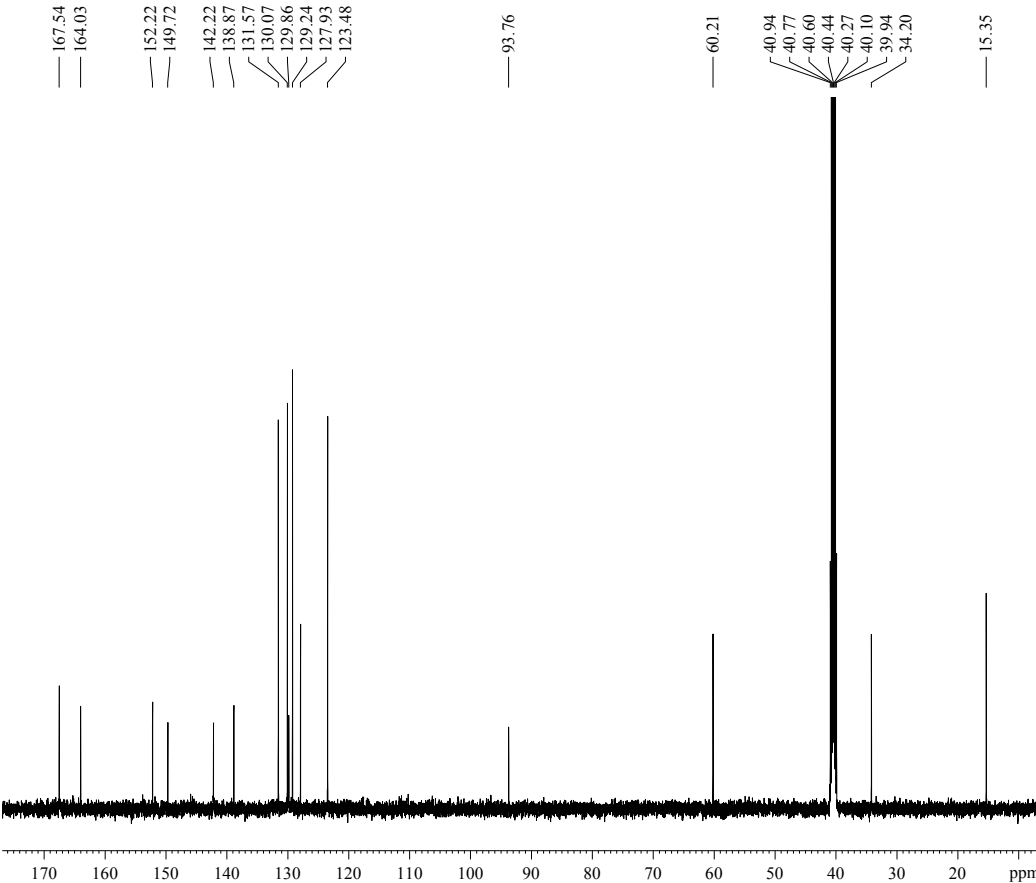

Compound 10 <sup>13</sup>C-NMR

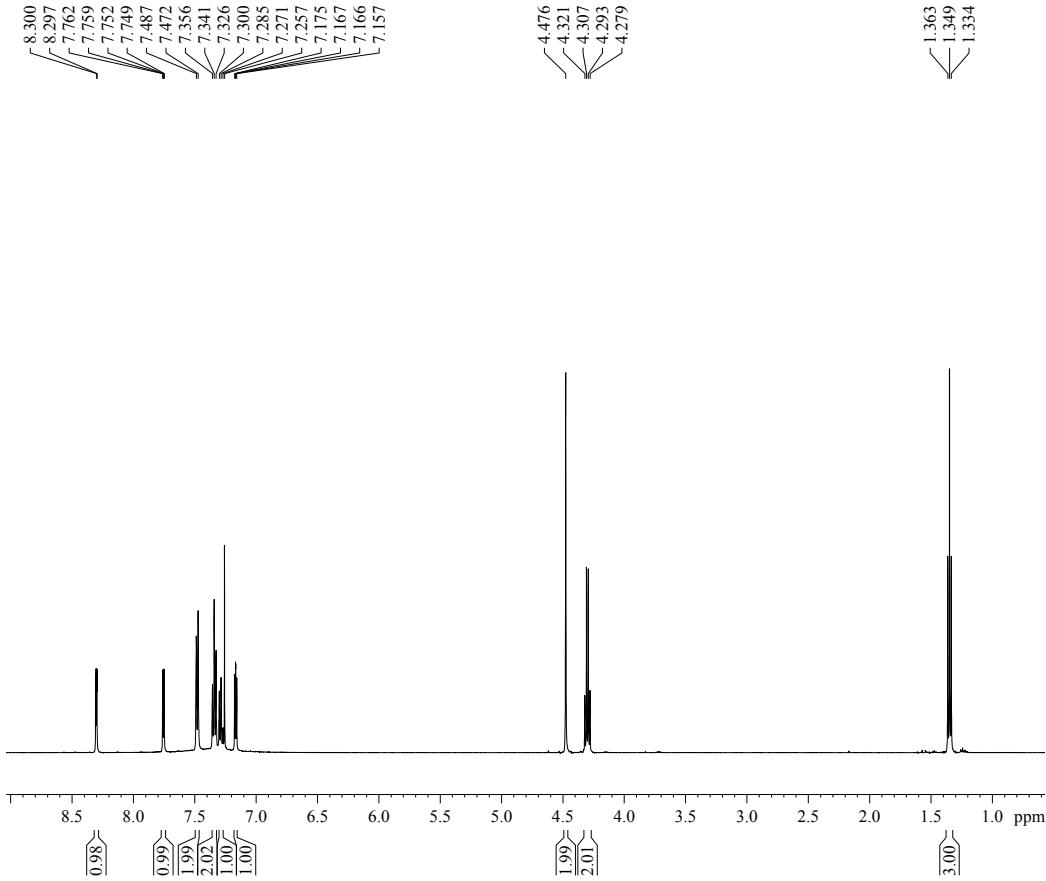

Compound 13 <sup>1</sup>H-NMR

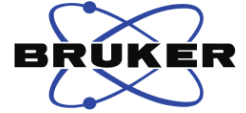

Current Data Parameters  
 NAME ZX-LXR-10  
 EXPNO 10  
 PROCNO 1

F2 - Acquisition Parameters  
 Date\_ 20131025  
 Time 9.50  
 INSTRUM spect  
 PROBHD 5 mm PABBO BB-  
 PULPROG zg30  
 TD 65536  
 SOLVENT CDCl3  
 NS 8  
 DS 2  
 SWH 10330.578 Hz  
 FIDRES 0.157632 Hz  
 AQ 3.1719923 sec  
 RG 181  
 DW 48.400 usec  
 DE 6.50 usec  
 TE 298.7 K  
 D1 1.00000000 sec  
 TD0 1

===== CHANNEL f1 =====  
 NUC1 1H  
 P1 9.00 usec  
 PL1 0 dB  
 PL1W -1.#IND0000 W  
 SFO1 500.1330885 MHz

F2 - Processing parameters  
 SI 32768  
 SF 500.1300246 MHz  
 WDW EM  
 SSB 0  
 LB 0.30 Hz  
 GB 0  
 PC 1.00

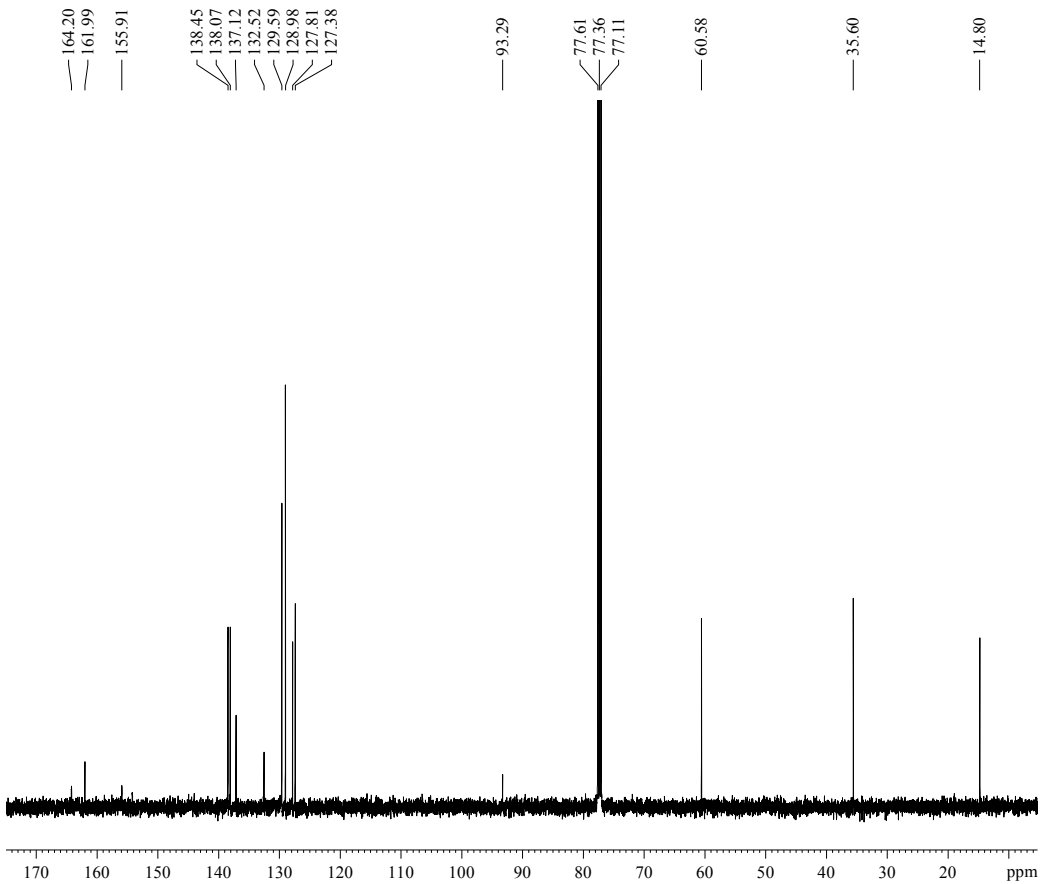

Compound 13 <sup>13</sup>C-NMR

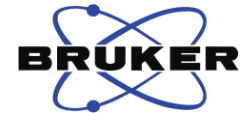

Current Data Parameters  
 NAME ZX-LXR-10  
 EXPNO 11  
 PROCNO 1

F2 - Acquisition Parameters  
 Date\_ 20131025  
 Time 9.54  
 INSTRUM spect  
 PROBHD 5 mm PABBO BB-  
 PULPROG zgpg30  
 TD 65536  
 SOLVENT CDCl3  
 NS 360  
 DS 4  
 SWH 29761.904 Hz  
 FIDRES 0.454131 Hz  
 AQ 1.1010548 sec  
 RG 203  
 DW 16.800 usec  
 DE 6.50 usec  
 TE 299.5 K  
 D1 0.60000002 sec  
 D11 0.03000000 sec  
 TD0 1

===== CHANNEL f1 =====  
 NUC1 13C  
 P1 9.50 usec  
 PL1 -1.00 dB  
 PL1W -1.#IND0000 W  
 SFO1 125.7703643 MHz

===== CHANNEL f2 =====  
 CPDPRG2 waltz16  
 NUC2 1H  
 PCPD2 80.00 usec  
 PL2 0 dB  
 PL12 16.05 dB  
 PL13 17.00 dB  
 PL2W -1.#IND0000 W  
 PL12W -1.#IND0000 W  
 PL13W -1.#IND0000 W  
 SFO2 500.1320005 MHz

F2 - Processing parameters  
 SI 32768  
 SF 125.7577491 MHz  
 WDW EM  
 SSB 0  
 LB 1.00 Hz  
 GB 0  
 PC 1.40

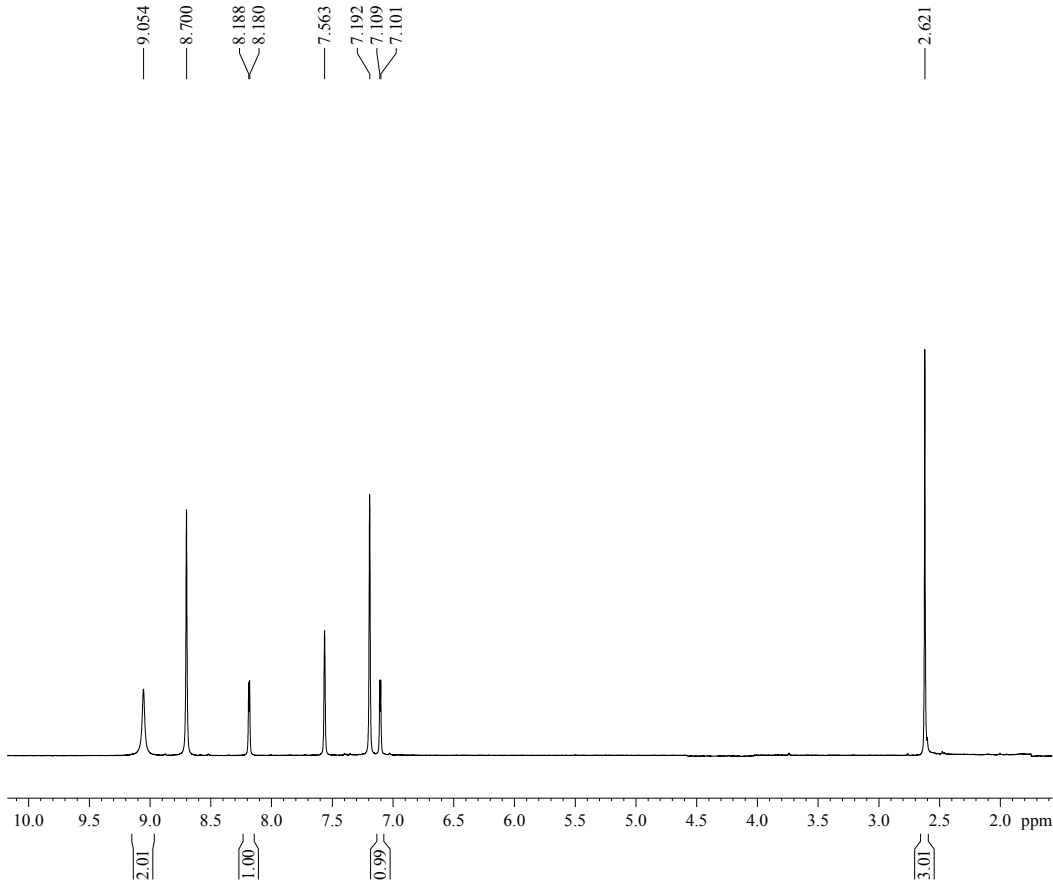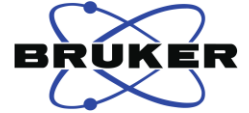

Current Data Parameters  
 NAME ZX-0107-LXR-45  
 EXPNO 10  
 PROCNO 1

F2 - Acquisition Parameters  
 Date\_ 20140107  
 Time 17.35  
 INSTRUM spect  
 PROBHD 5 mm PABBO BB-  
 PULPROG zg30  
 TD 65536  
 SOLVENT Pyr  
 NS 8  
 DS 2  
 SWH 10330.578 Hz  
 FIDRES 0.157632 Hz  
 AQ 3.1719923 sec  
 RG 203  
 DW 48.400 usec  
 DE 6.50 usec  
 TE 332.9 K  
 D1 1.00000000 sec  
 TD0 1

===== CHANNEL f1 =====  
 NUC1 1H  
 P1 9.00 usec  
 PL1 0 dB  
 PL1W -1.#IND0000 W  
 SFO1 500.1330885 MHz

F2 - Processing parameters  
 SI 32768  
 SF 500.1307528 MHz  
 WDW EM  
 SSB 0  
 LB 0.30 Hz  
 GB 0  
 PC 1.00

Compound 15 <sup>1</sup>H-NMR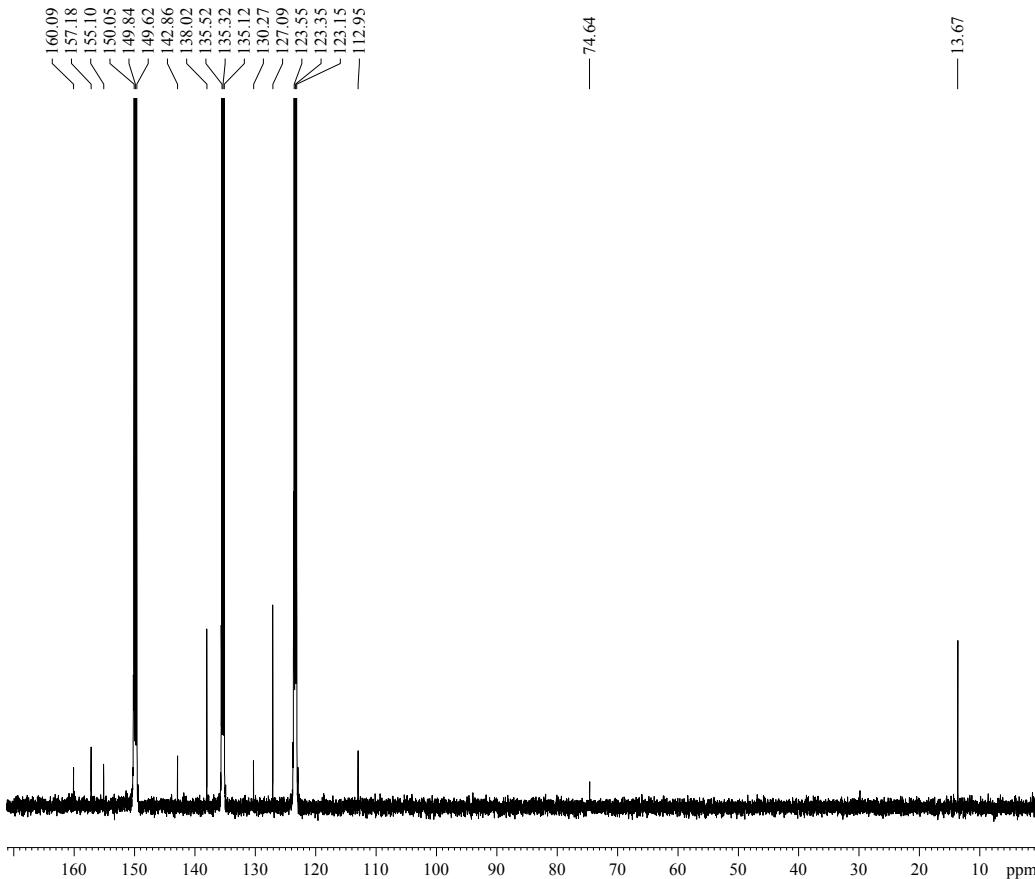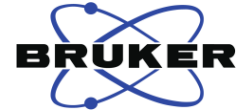

Current Data Parameters  
 NAME ZX-0107-LXR-45  
 EXPNO 11  
 PROCNO 1

F2 - Acquisition Parameters  
 Date\_ 20140107  
 Time 17.45  
 INSTRUM spect  
 PROBHD 5 mm PABBO BB-  
 PULPROG zgpg30  
 TD 65536  
 SOLVENT Pyr  
 NS 1408  
 DS 4  
 SWH 29761.904 Hz  
 FIDRES 0.454131 Hz  
 AQ 1.1010548 sec  
 RG 203  
 DW 16.800 usec  
 DE 6.50 usec  
 TE 333.0 K  
 D1 0.60000002 sec  
 D11 0.03000000 sec  
 TD0 1

===== CHANNEL f1 =====  
 NUC1 13C  
 P1 9.50 usec  
 PL1 -1.00 dB  
 PL1W -1.#IND0000 W  
 SFO1 125.7703643 MHz

===== CHANNEL f2 =====  
 CPDPRG2 waltz16  
 NUC2 1H  
 PCPD2 80.00 usec  
 PL2 0 dB  
 PL12 16.05 dB  
 PL13 17.00 dB  
 PL12W -1.#IND0000 W  
 PL12W -1.#IND0000 W  
 PL13W -1.#IND0000 W  
 SFO2 500.1320005 MHz

F2 - Processing parameters  
 SI 32768  
 SF 125.7579527 MHz  
 WDW EM  
 SSB 0  
 LB 1.00 Hz  
 GB 0  
 PC 1.40

Compound 15 <sup>13</sup>C-NMR

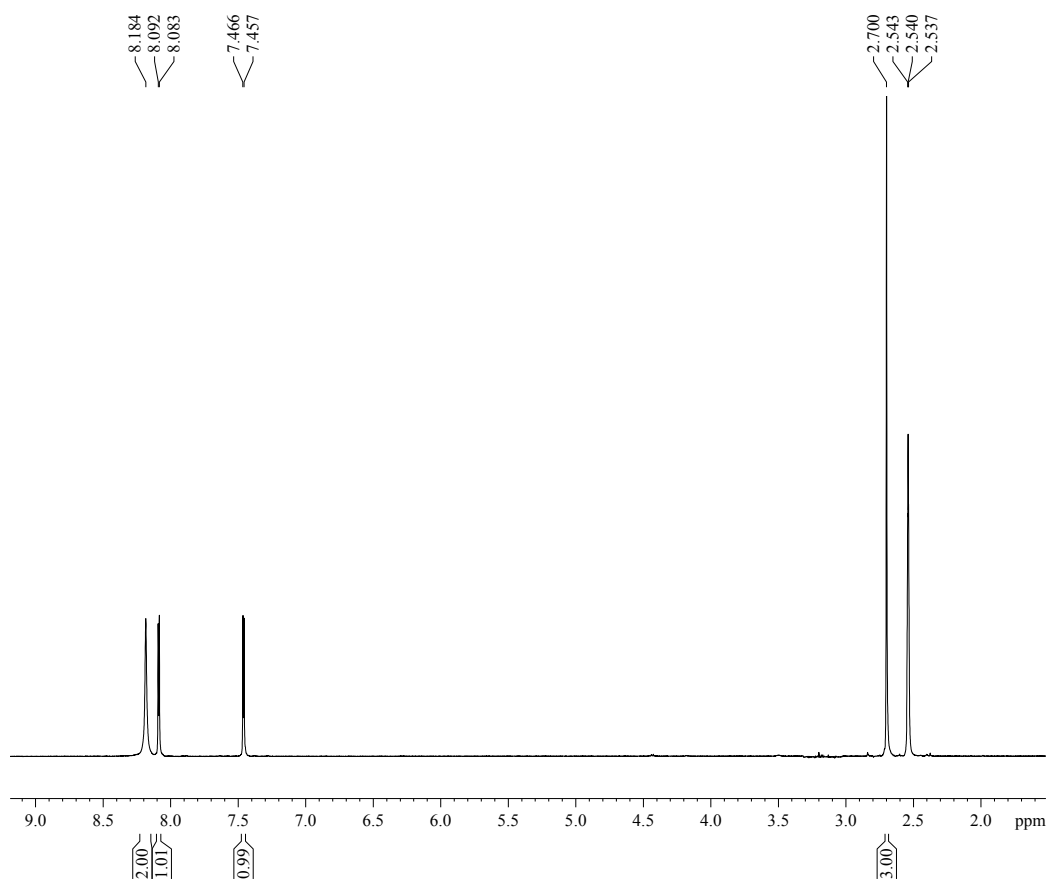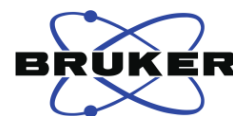

Current Data Parameters  
 NAME ZX-0107-LXR-44  
 EXPNO 10  
 PROCNO 1

F2 - Acquisition Parameters  
 Date\_ 20140107  
 Time\_ 17.09  
 INSTRUM spect  
 PROBHD 5 mm PABBO BB-  
 PULPROG zg30  
 TD 65536  
 SOLVENT DMSO  
 NS 8  
 DS 2  
 SWH 10330.578 Hz  
 FIDRES 0.157632 Hz  
 AQ 3.1719923 sec  
 RG 203  
 DW 48.400 usec  
 DE 6.50 usec  
 TE 333.8 K  
 D1 1.00000000 sec  
 TD0 1

===== CHANNEL f1 =====  
 NUC1 1H  
 P1 9.00 usec  
 PL1 0 dB  
 PL1W -1.#IND0000 W  
 SFO1 500.1330885 MHz

F2 - Processing parameters  
 SI 32768  
 SF 500.1299851 MHz  
 WDW EM  
 SSB 0  
 LB 0.30 Hz  
 GB 0  
 PC 1.00

Compound 18 <sup>1</sup>H-NMR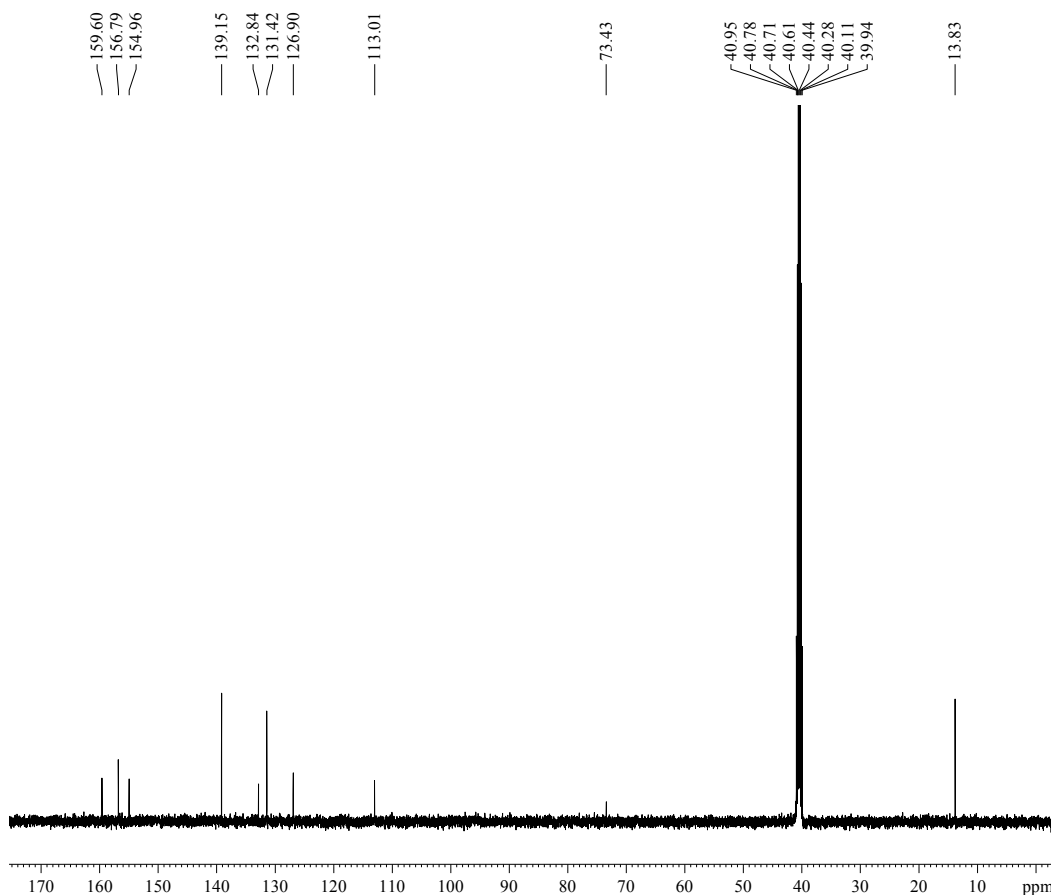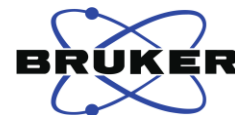

Current Data Parameters  
 NAME ZX-0107-LXR-44  
 EXPNO 11  
 PROCNO 1

F2 - Acquisition Parameters  
 Date\_ 20140107  
 Time\_ 17.11  
 INSTRUM spect  
 PROBHD 5 mm PABBO BB-  
 PULPROG zgpg30  
 TD 65536  
 SOLVENT DMSO  
 NS 649  
 DS 4  
 SWH 29761.904 Hz  
 FIDRES 0.454131 Hz  
 AQ 1.1010548 sec  
 RG 203  
 DW 16.800 usec  
 DE 6.50 usec  
 TE 333.4 K  
 D1 0.60000002 sec  
 D11 0.03000000 sec  
 TD0 1

===== CHANNEL f1 =====  
 NUC1 13C  
 P1 9.50 usec  
 PL1 -1.00 dB  
 PL1W -1.#IND0000 W  
 SFO1 125.7703643 MHz

===== CHANNEL f2 =====  
 CPDPRG2 waltz16  
 NUC2 1H  
 PCPD2 80.00 usec  
 PL2 0 dB  
 PL12 16.05 dB  
 PL13 17.00 dB  
 PL2W -1.#IND0000 W  
 PL12W -1.#IND0000 W  
 PL13W -1.#IND0000 W  
 SFO2 500.1320005 MHz

F2 - Processing parameters  
 SI 32768  
 SF 125.7577688 MHz  
 WDW EM  
 SSB 0  
 LB 1.00 Hz  
 GB 0  
 PC 1.40

Compound 18 <sup>13</sup>C-NMR

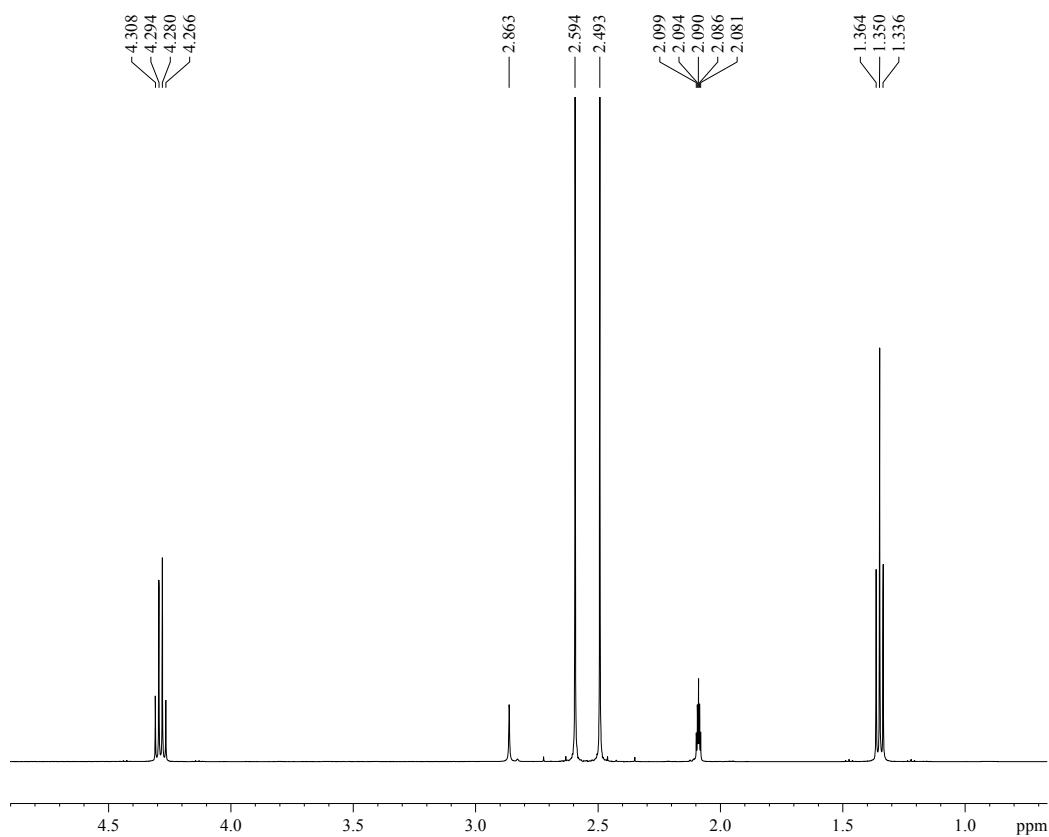Compound 19  $^1\text{H-NMR}$ 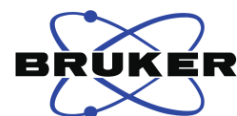

Current Data Parameters  
 NAME ZX-20140324-LXR-79  
 EXPNO 10  
 PROCNO 1

F2 - Acquisition Parameters  
 Date\_ 20140324  
 Time 10.53  
 INSTRUM spect  
 PROBHD 5 mm PABBO BB-  
 PULPROG zg30  
 TD 65536  
 SOLVENT Acetone  
 NS 16  
 DS 2  
 SWH 10330.578 Hz  
 FIDRES 0.157632 Hz  
 AQ 3.1719923 sec  
 RG 114  
 DW 48.400 usec  
 DE 6.50 usec  
 TE 296.4 K  
 D1 1.00000000 sec  
 TD0 1

===== CHANNEL f1 =====  
 NUC1 1H  
 P1 9.00 usec  
 PL1 0 dB  
 PL1W -1.#IND0000 W  
 SFO1 500.1330885 MHz

F2 - Processing parameters  
 SI 32768  
 SF 500.1299898 MHz  
 WDW EM  
 SSB 0  
 LB 0.30 Hz  
 GB 0  
 PC 1.00

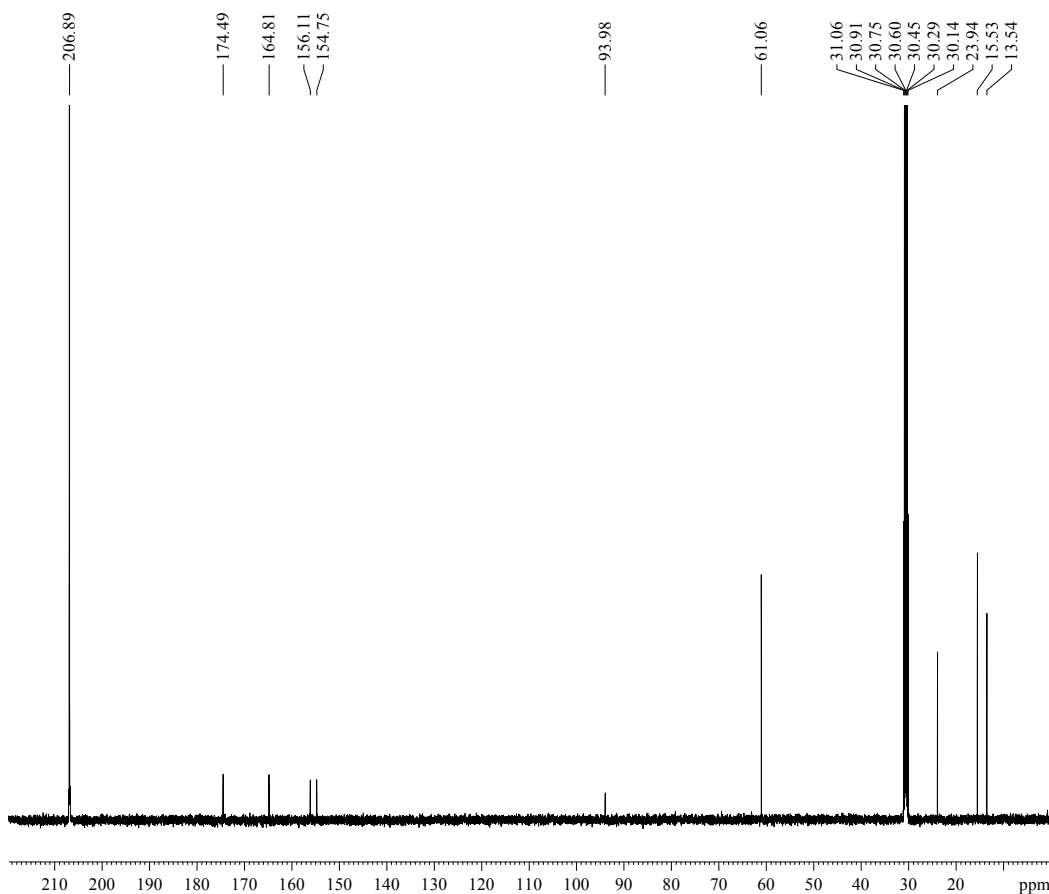Compound 19  $^{13}\text{C-NMR}$ 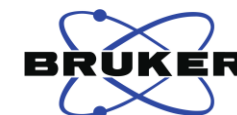

Current Data Parameters  
 NAME ZX-20140324-LXR-79  
 EXPNO 11  
 PROCNO 1

F2 - Acquisition Parameters  
 Date\_ 20140324  
 Time 10.54  
 INSTRUM spect  
 PROBHD 5 mm PABBO BB-  
 PULPROG zgpg30  
 TD 65536  
 SOLVENT Acetone  
 NS 403  
 DS 4  
 SWH 29761.904 Hz  
 FIDRES 0.454131 Hz  
 AQ 1.1010548 sec  
 RG 203  
 DW 16.800 usec  
 DE 6.50 usec  
 TE 296.8 K  
 D1 0.60000002 sec  
 D11 0.03000000 sec  
 TD0 1

===== CHANNEL f1 =====  
 NUC1 13C  
 P1 9.50 usec  
 PL1 -1.00 dB  
 PL1W -1.#IND0000 W  
 SFO1 125.7703643 MHz

===== CHANNEL f2 =====  
 CPDPRG2 waltz16  
 NUC2 1H  
 PCPD2 80.00 usec  
 PL2 0 dB  
 PL12 16.05 dB  
 PL13 17.00 dB  
 PL2W -1.#IND0000 W  
 PL12W -1.#IND0000 W  
 PL13W -1.#IND0000 W  
 SFO2 500.1320005 MHz

F2 - Processing parameters  
 SI 32768  
 SF 125.7575810 MHz  
 WDW EM  
 SSB 0  
 LB 1.00 Hz  
 GB 0  
 PC 1.40

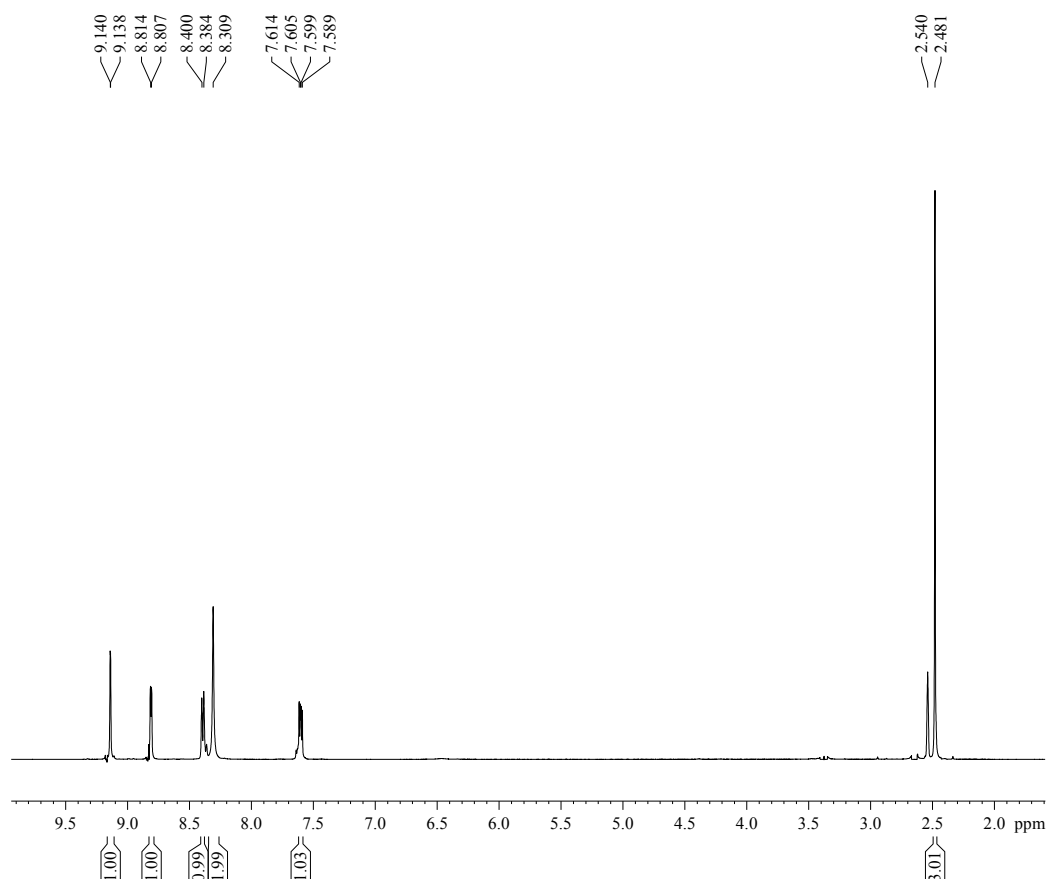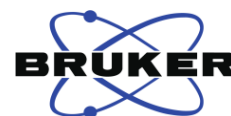

Current Data Parameters  
 NAME ZX-20131209-LXR-17  
 EXPNO 10  
 PROCNO 1

F2 - Acquisition Parameters  
 Date\_ 20131209  
 Time 16.49  
 INSTRUM spect  
 PROBHD 5 mm PABBO BB-  
 PULPROG zg30  
 TD 65536  
 SOLVENT DMSO  
 NS 12  
 DS 2  
 SWH 10330.578 Hz  
 FIDRES 0.157632 Hz  
 AQ 3.1719923 sec  
 RG 114  
 DW 48.400 usec  
 DE 6.50 usec  
 TE 297.9 K  
 D1 1.00000000 sec  
 TD0 1

===== CHANNEL f1 =====  
 NUC1 1H  
 P1 9.00 usec  
 PL1 0 dB  
 PL1W -1.#IND0000 W  
 SFO1 500.1330885 MHz

F2 - Processing parameters  
 SI 32768  
 SF 500.1299847 MHz  
 WDW EM  
 SSB 0  
 LB 0.30 Hz  
 GB 0  
 PC 1.00

Compound 21 <sup>1</sup>H-NMR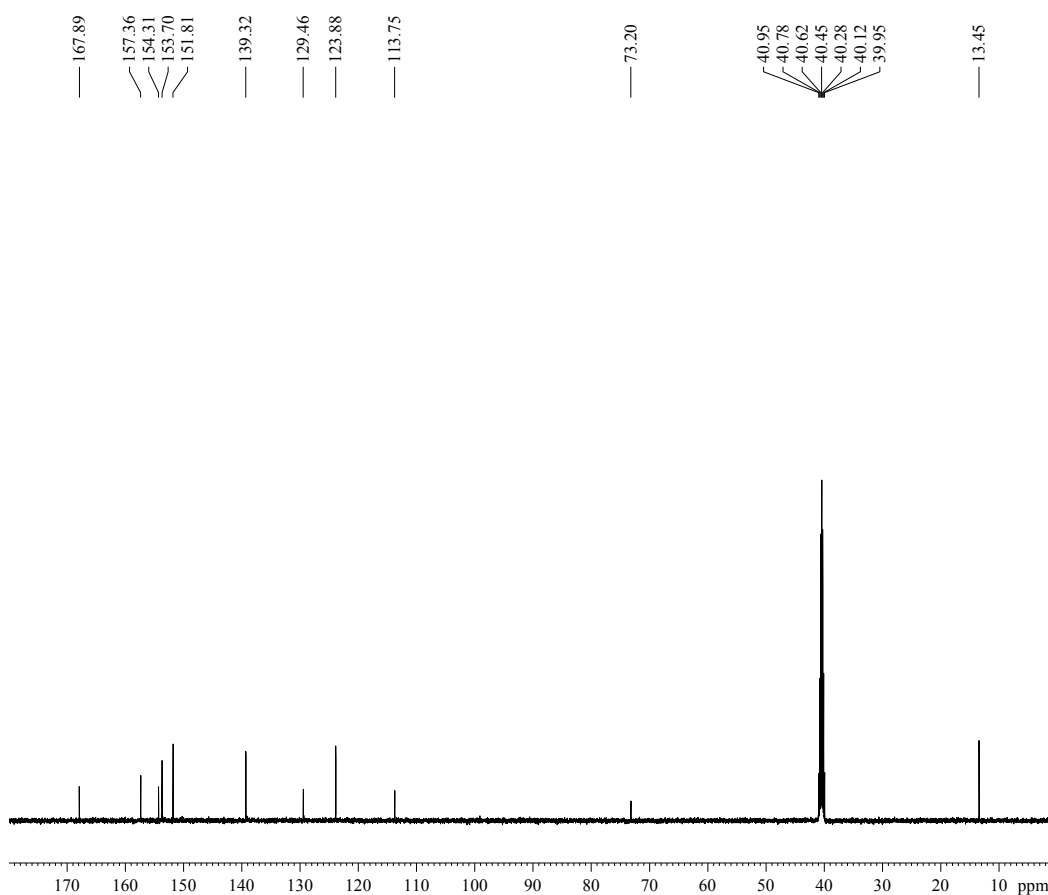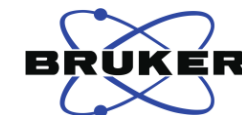

Current Data Parameters  
 NAME ZX-20131209-LXR-17  
 EXPNO 11  
 PROCNO 1

F2 - Acquisition Parameters  
 Date\_ 20131209  
 Time 16.52  
 INSTRUM spect  
 PROBHD 5 mm PABBO BB-  
 PULPROG zgpg30  
 TD 65536  
 SOLVENT DMSO  
 NS 116  
 DS 4  
 SWH 29761.904 Hz  
 FIDRES 0.454131 Hz  
 AQ 1.1010548 sec  
 RG 203  
 DW 16.800 usec  
 DE 6.50 usec  
 TE 298.3 K  
 D1 0.60000002 sec  
 D11 0.03000000 sec  
 TD0 1

===== CHANNEL f1 =====  
 NUC1 13C  
 P1 9.50 usec  
 PL1 -1.00 dB  
 PL1W -1.#IND0000 W  
 SFO1 125.7703643 MHz

===== CHANNEL f2 =====  
 CPDPRG2 waltz16  
 NUC2 1H  
 PCPD2 80.00 usec  
 PL2 0 dB  
 PL12 16.05 dB  
 PL13 17.00 dB  
 PL2W -1.#IND0000 W  
 PL12W -1.#IND0000 W  
 PL13W -1.#IND0000 W  
 SFO2 500.1320005 MHz

F2 - Processing parameters  
 SI 32768  
 SF 125.7577305 MHz  
 WDW EM  
 SSB 0  
 LB 1.00 Hz  
 GB 0  
 PC 1.40

Compound 21 <sup>13</sup>C-NMR



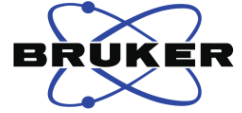

Current Data Parameters  
 NAME ZX-0118-LXR-51  
 EXPNO 10  
 PROCNO 1

F2 - Acquisition Parameters  
 Date\_ 20140118  
 Time\_ 12.27  
 INSTRUM spect  
 PROBHD 5 mm PABBO BB-  
 PULPROG zg30  
 TD 65536  
 SOLVENT DMSO  
 NS 15  
 DS 2  
 SWH 10330.578 Hz  
 FIDRES 0.157632 Hz  
 AQ 3.1719923 sec  
 RG 203  
 DW 48.400 usec  
 DE 6.50 usec  
 TE 298.1 K  
 D1 1.00000000 sec  
 TD0 1

===== CHANNEL f1 =====  
 NUC1 1H  
 P1 9.00 usec  
 PL1 0 dB  
 PL1W -1. #IND0000 W  
 SFO1 500.1330885 MHz

F2 - Processing parameters  
 SI 32768  
 SF 500.1299844 MHz  
 WDW EM  
 SSB 0  
 LB 0.30 Hz  
 GB 0  
 PC 1.00

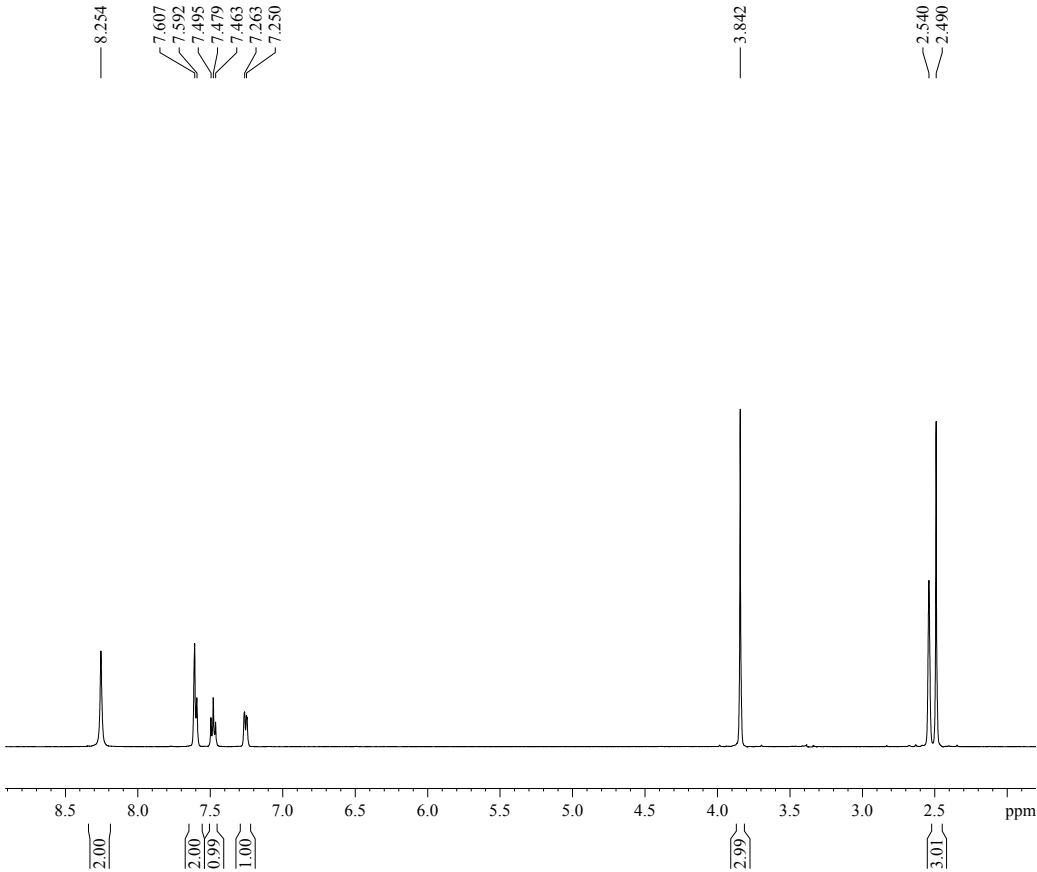Compound 25 <sup>1</sup>H-NMR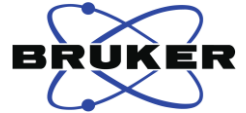

Current Data Parameters  
 NAME ZX-0118-LXR-51  
 EXPNO 11  
 PROCNO 1

F2 - Acquisition Parameters  
 Date\_ 20140118  
 Time\_ 12.29  
 INSTRUM spect  
 PROBHD 5 mm PABBO BB-  
 PULPROG zgpg30  
 TD 65536  
 SOLVENT DMSO  
 NS 256  
 DS 4  
 SWH 29761.904 Hz  
 FIDRES 0.454131 Hz  
 AQ 1.1010548 sec  
 RG 203  
 DW 16.800 usec  
 DE 6.50 usec  
 TE 297.9 K  
 D1 0.60000002 sec  
 D11 0.03000000 sec  
 TD0 1

===== CHANNEL f1 =====  
 NUC1 13C  
 P1 9.50 usec  
 PL1 -1.00 dB  
 PL1W -1. #IND0000 W  
 SFO1 125.7703643 MHz

===== CHANNEL f2 =====  
 CPDPRG2 waltz16  
 NUC2 1H  
 PCPD2 80.00 usec  
 PL2 0 dB  
 PL12 16.05 dB  
 PL13 17.00 dB  
 PL2W -1. #IND0000 W  
 PL12W -1. #IND0000 W  
 PL13W -1. #IND0000 W  
 SFO2 500.1320005 MHz

F2 - Processing parameters  
 SI 32768  
 SF 125.7577313 MHz  
 WDW EM  
 SSB 0  
 LB 1.00 Hz  
 GB 0  
 PC 1.40

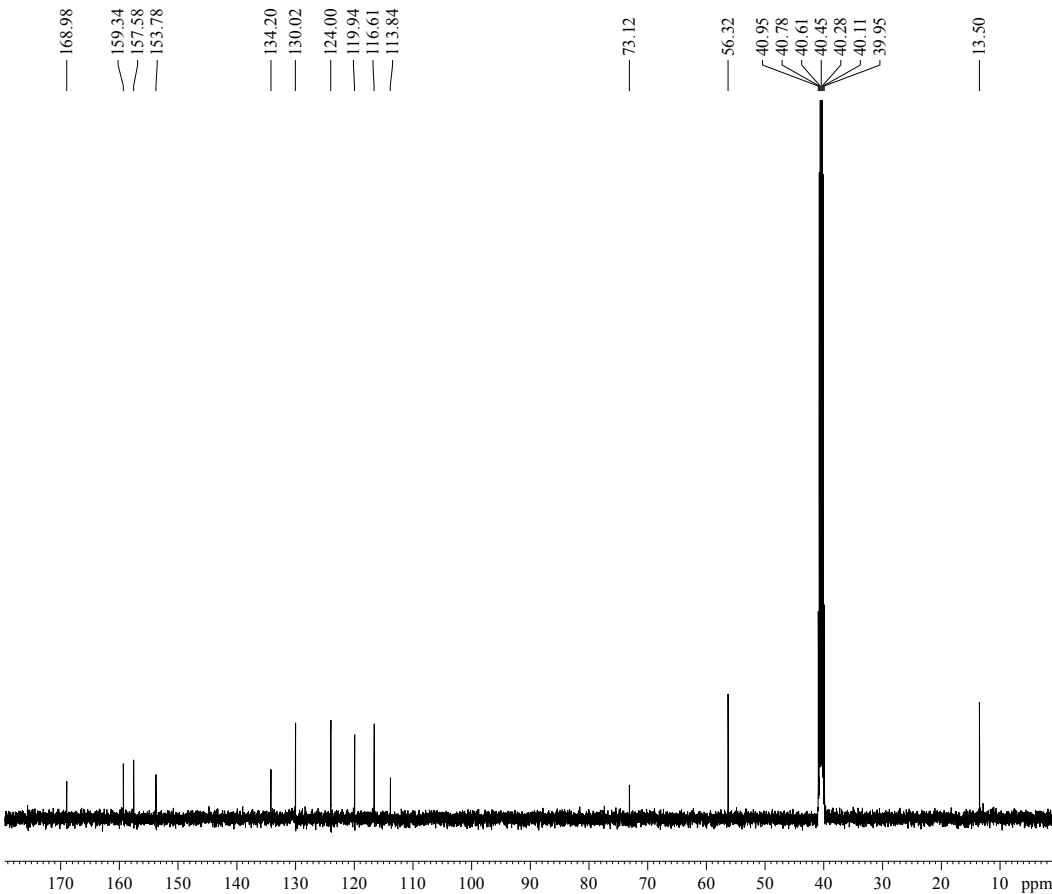Compound 25 <sup>13</sup>C-NMR

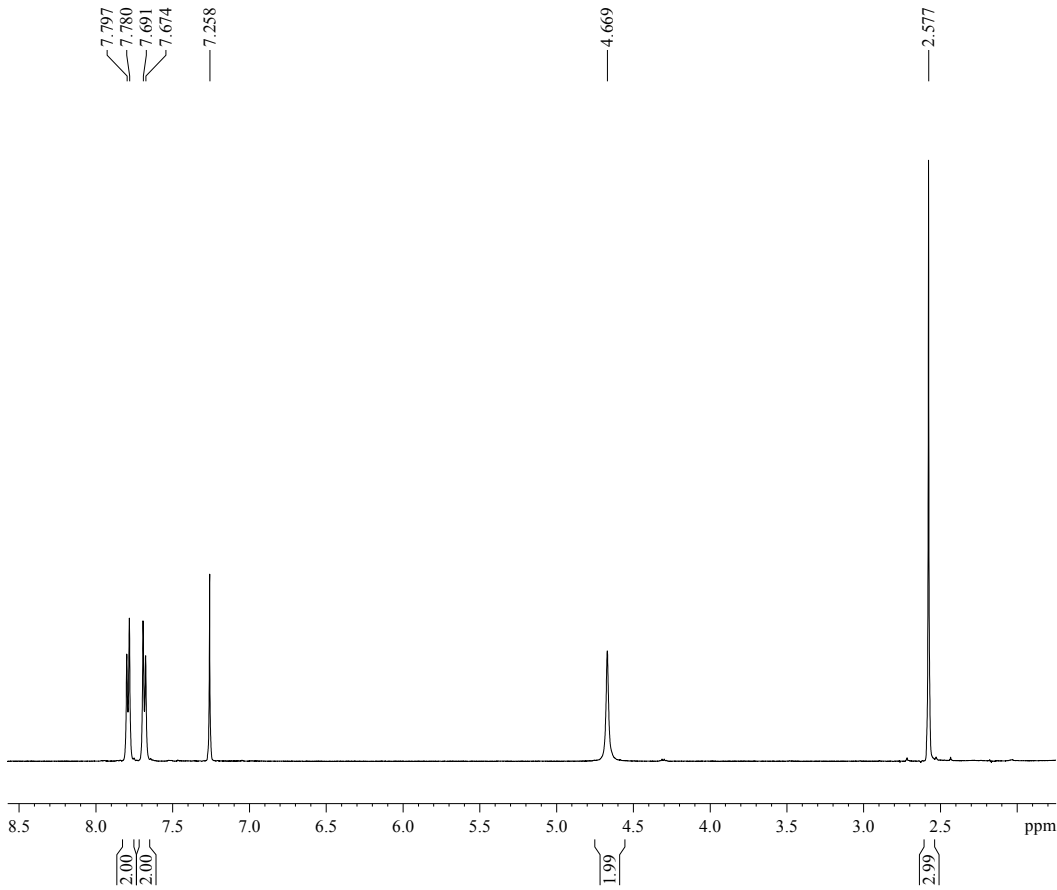Compound 26 <sup>1</sup>H-NMR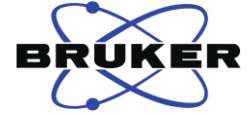

Current Data Parameters  
NAME ZX-0118-LXR-48  
EXPNO 10  
PROCNO 1

F2 - Acquisition Parameters  
Date 20140118  
Time 10.39  
INSTRUM spect  
PROBHD 5 mm PABBO BB-  
PULPROG zg30  
TD 65536  
SOLVENT CDCl3  
NS 16  
DS 2  
SWH 10330.578 Hz  
FIDRES 0.157632 Hz  
AQ 3.1719923 sec  
RG 161  
DW 48.400 usec  
DE 6.50 usec  
TE 294.4 K  
D1 1.00000000 sec  
TD0 1

===== CHANNEL f1 =====  
NUC1 1H  
P1 9.00 usec  
PL1 0 dB  
PL1W -1.#IND0000 W  
SFO1 500.1330885 MHz

F2 - Processing parameters  
SI 32768  
SF 500.1300239 MHz  
WDW EM  
SSB 0  
LB 0.30 Hz  
GB 0  
PC 1.00

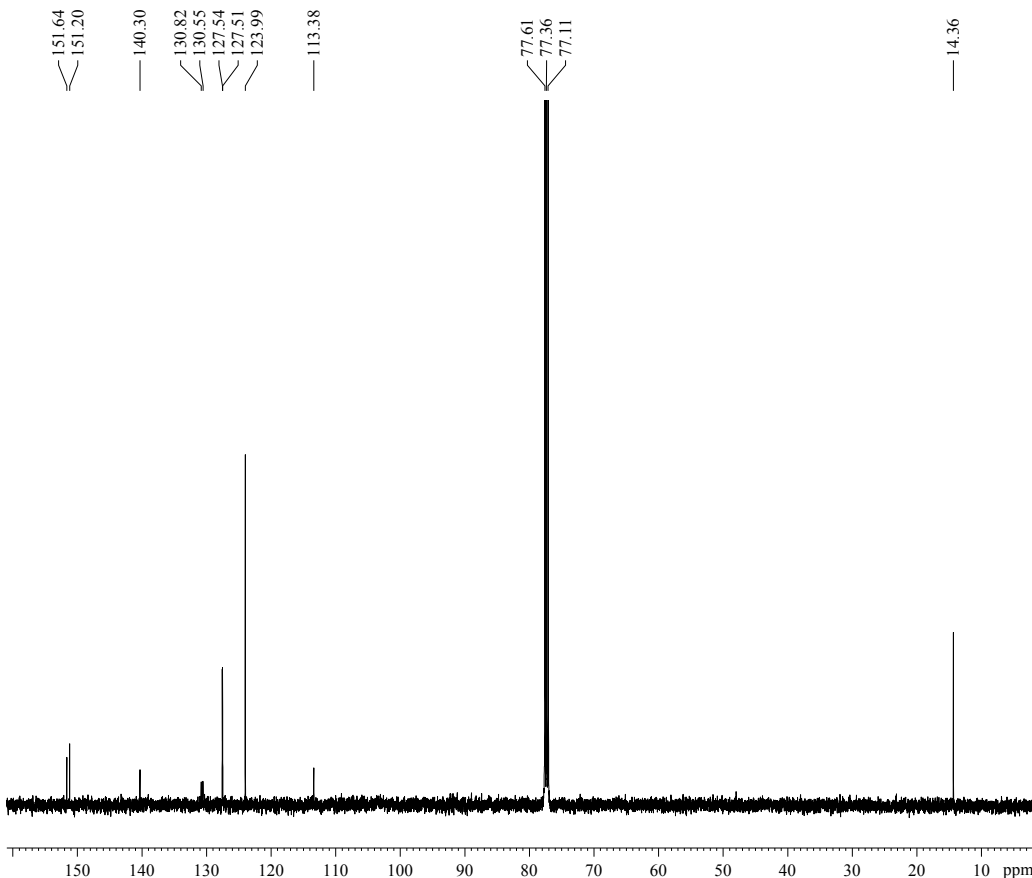Compound 26 <sup>13</sup>C-NMR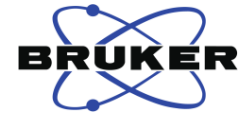

Current Data Parameters  
NAME ZX-0118-LXR-48  
EXPNO 11  
PROCNO 1

F2 - Acquisition Parameters  
Date 20140118  
Time 10.41  
INSTRUM spect  
PROBHD 5 mm PABBO BB-  
PULPROG zgpg30  
TD 65536  
SOLVENT CDCl3  
NS 1063  
DS 4  
SWH 29761.904 Hz  
FIDRES 0.454131 Hz  
AQ 1.1010548 sec  
RG 203  
DW 16.800 usec  
DE 6.50 usec  
TE 295.2 K  
D1 0.60000002 sec  
D11 0.03000000 sec  
TD0 1

===== CHANNEL f1 =====  
NUC1 13C  
P1 9.50 usec  
PL1 -1.00 dB  
PL1W -1.#IND0000 W  
SFO1 125.7703643 MHz

===== CHANNEL f2 =====  
CPDPRG2 waltz16  
NUC2 1H  
PCPD2 80.00 usec  
PL2 0 dB  
PL12 16.05 dB  
PL13 17.00 dB  
PL2W -1.#IND0000 W  
PL12W -1.#IND0000 W  
PL13W -1.#IND0000 W  
SFO2 500.1320005 MHz

F2 - Processing parameters  
SI 32768  
SF 125.7577499 MHz  
WDW EM  
SSB 0  
LB 1.00 Hz  
GB 0  
PC 1.40

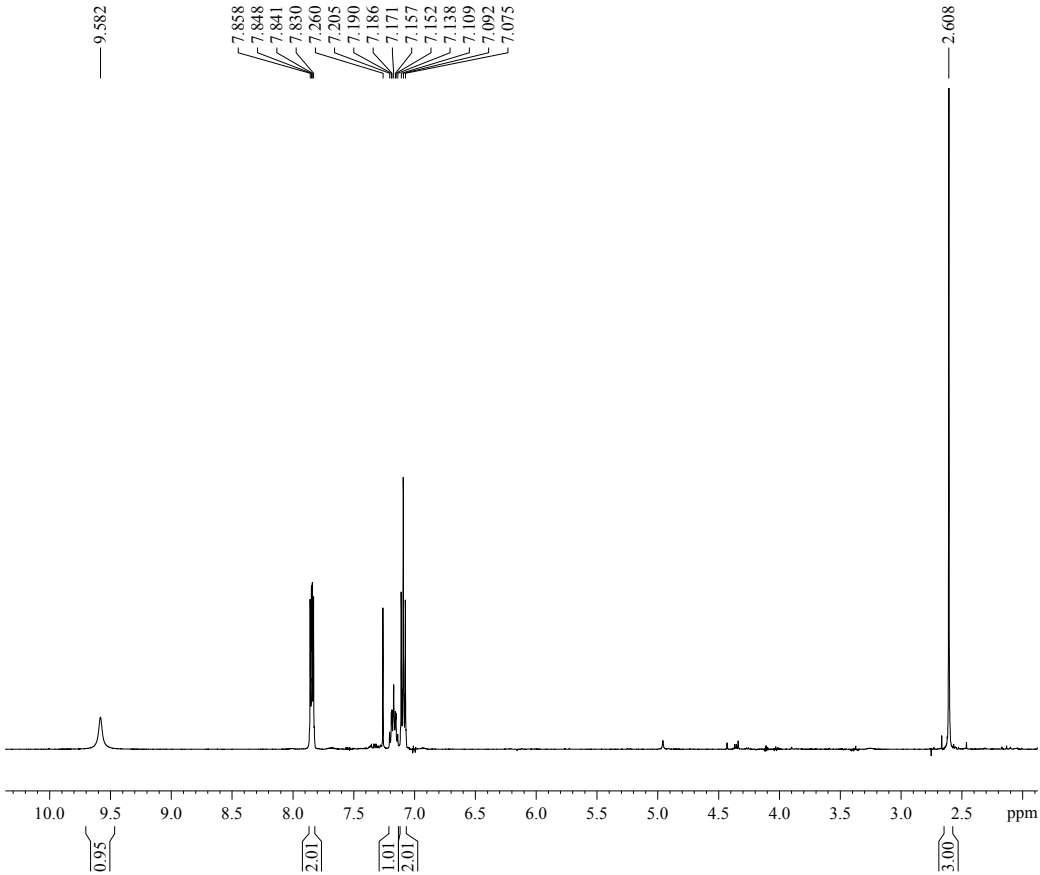

Compound 27 <sup>1</sup>H-NMR

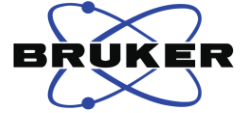

Current Data Parameters  
 NAME ZX-20140422-LXR-X10  
 EXPNO 10  
 PROCNO 1

F2 - Acquisition Parameters  
 Date\_ 20140422  
 Time 10.10  
 INSTRUM spect  
 PROBHD 5 mm PABBO BB-  
 PULPROG zg30  
 TD 65536  
 SOLVENT CDCl3  
 NS 8  
 DS 2  
 SWH 10330.578 Hz  
 FIDRES 0.157632 Hz  
 AQ 3.1719923 sec  
 RG 101  
 DW 48.400 usec  
 DE 6.50 usec  
 TE 295.8 K  
 D1 1.00000000 sec  
 TD0 1

===== CHANNEL f1 =====  
 NUC1 1H  
 P1 9.00 usec  
 PL1 0 dB  
 PL1W -1.#IND0000 W  
 SFO1 500.1330885 MHz

F2 - Processing parameters  
 SI 32768  
 SF 500.1300233 MHz  
 WDW EM  
 SSB 0  
 LB 0.30 Hz  
 GB 0  
 PC 1.00

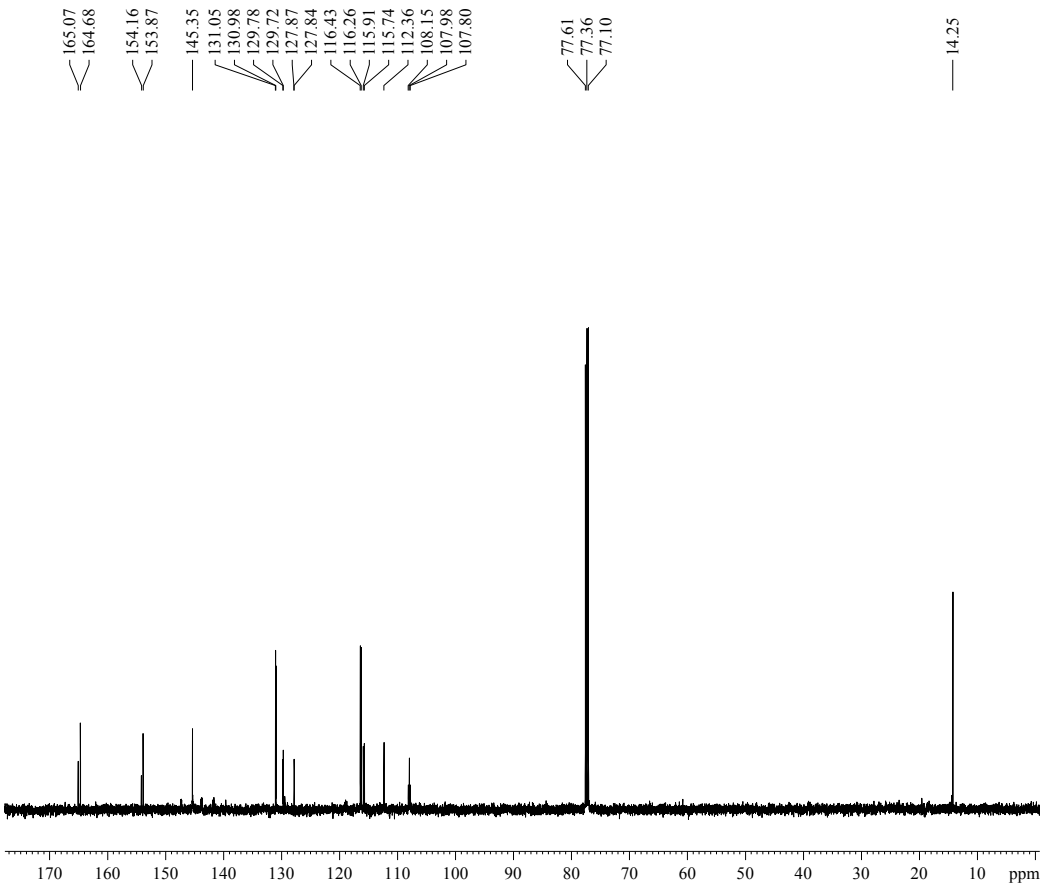

Compound 27 <sup>13</sup>C-NMR

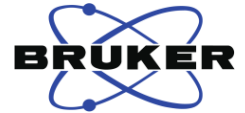

Current Data Parameters  
 NAME ZX-20140422-LXR-X10  
 EXPNO 11  
 PROCNO 1

F2 - Acquisition Parameters  
 Date\_ 20140422  
 Time 10.13  
 INSTRUM spect  
 PROBHD 5 mm PABBO BB-  
 PULPROG zgpg30  
 TD 65536  
 SOLVENT CDCl3  
 NS 150  
 DS 4  
 SWH 29761.904 Hz  
 FIDRES 0.454131 Hz  
 AQ 1.1010548 sec  
 RG 203  
 DW 16.800 usec  
 DE 6.50 usec  
 TE 296.5 K  
 D1 0.60000002 sec  
 D11 0.03000000 sec  
 TD0 1

===== CHANNEL f1 =====  
 NUC1 13C  
 P1 9.50 usec  
 PL1 -1.00 dB  
 PL1W -1.#IND0000 W  
 SFO1 125.7703643 MHz

===== CHANNEL f2 =====  
 CPDPRG2 waltz16  
 NUC2 1H  
 PCPD2 80.00 usec  
 PL2 0 dB  
 PL12 16.05 dB  
 PL13 17.00 dB  
 PL2W -1.#IND0000 W  
 PL12W -1.#IND0000 W  
 PL13W -1.#IND0000 W  
 SFO2 500.1320005 MHz

F2 - Processing parameters  
 SI 32768  
 SF 125.7577522 MHz  
 WDW EM  
 SSB 0  
 LB 1.00 Hz  
 GB 0  
 PC 1.40

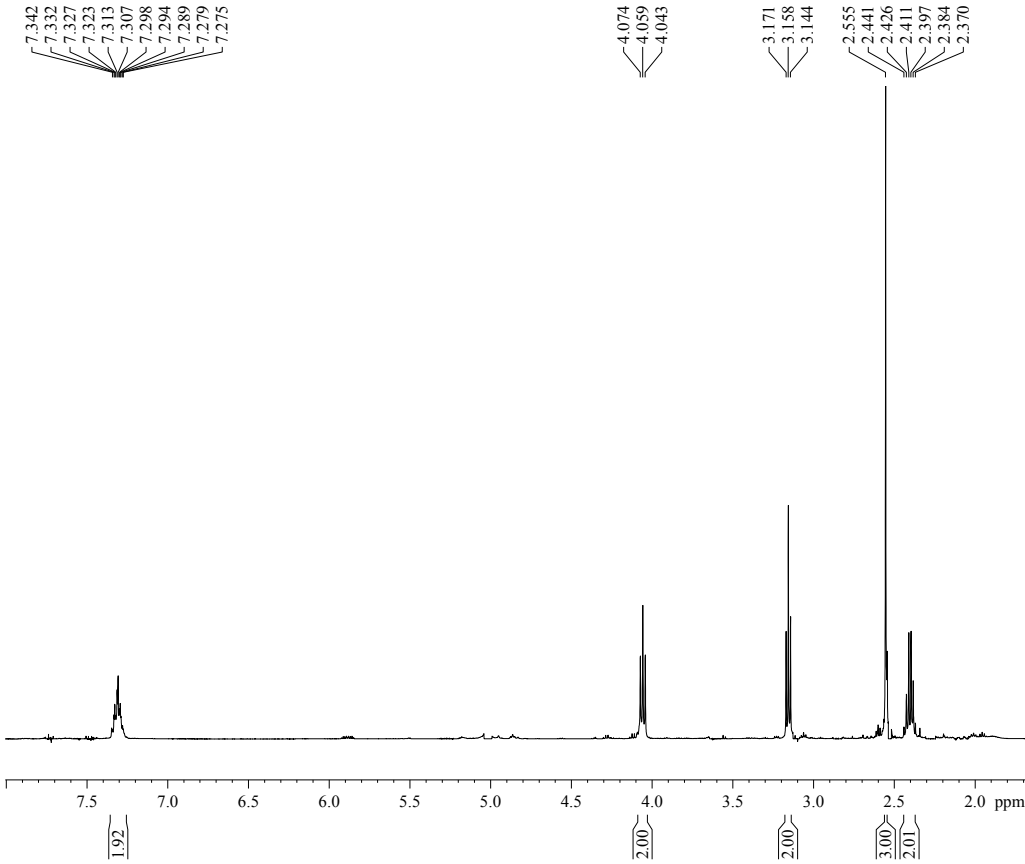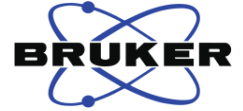

Current Data Parameters  
 NAME ZX-20140612-LXR-S4  
 EXPNO 10  
 PROCNO 1

F2 - Acquisition Parameters  
 Date 20140612  
 Time 10.17  
 INSTRUM spect  
 PROBHD 5 mm PABBO BB-  
 PULPROG zg30  
 TD 65536  
 SOLVENT CDCl3  
 NS 16  
 DS 2  
 SWH 10330.578 Hz  
 FIDRES 0.157632 Hz  
 AQ 3.1719923 sec  
 RG 57  
 DW 48.400 usec  
 DE 6.50 usec  
 TE 300.3 K  
 D1 1.00000000 sec  
 TD0 1

==== CHANNEL f1 =====  
 NUC1 1H  
 P1 9.00 usec  
 PL1 0 dB  
 PL1W -1.#IND0000 W  
 SFO1 500.1330885 MHz

F2 - Processing parameters  
 SI 32768  
 SF 500.1300000 MHz  
 WDW EM  
 SSB 0  
 LB 0.30 Hz  
 GB 0  
 PC 1.00

Compound 30 <sup>1</sup>H-NMR

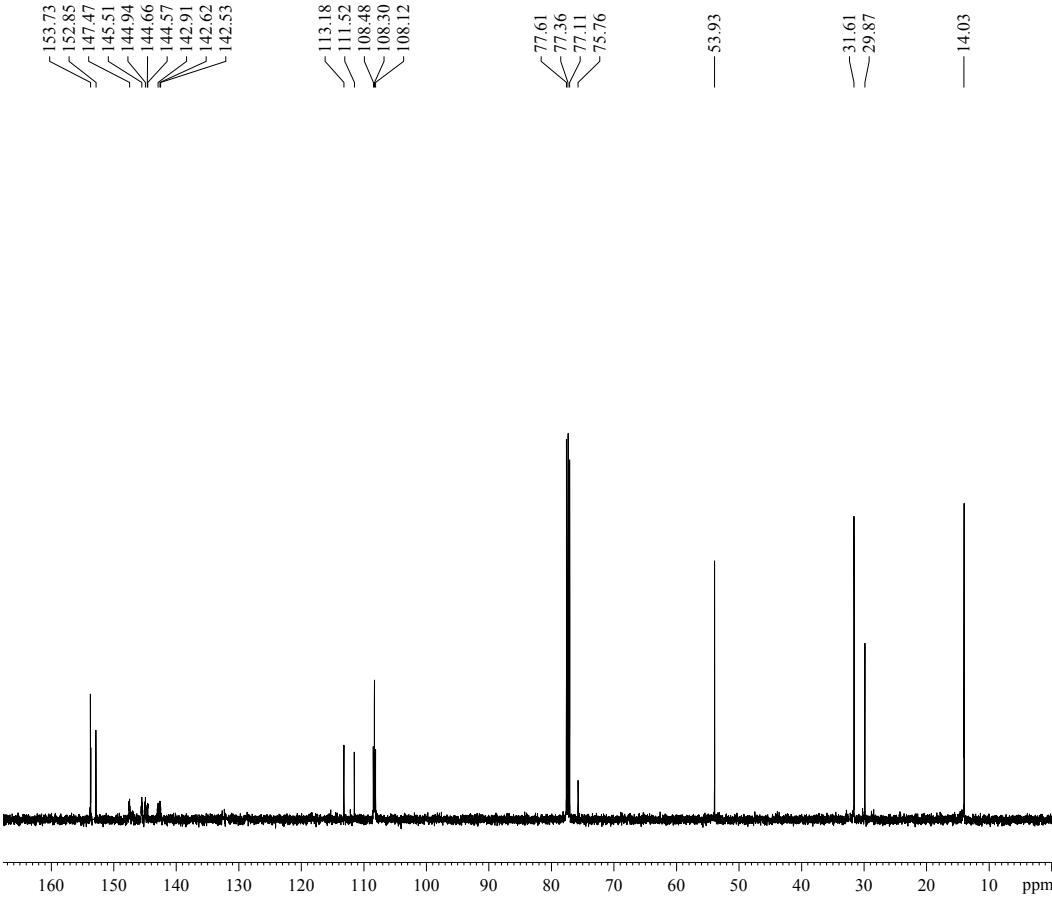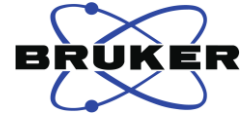

Current Data Parameters  
 NAME ZX-20140612-LXR-S4  
 EXPNO 11  
 PROCNO 1

F2 - Acquisition Parameters  
 Date 20140612  
 Time 10.20  
 INSTRUM spect  
 PROBHD 5 mm PABBO BB-  
 PULPROG zgpg30  
 TD 65536  
 SOLVENT CDCl3  
 NS 120  
 DS 4  
 SWH 29761.904 Hz  
 FIDRES 0.454131 Hz  
 AQ 1.1010548 sec  
 RG 203  
 DW 16.800 usec  
 DE 6.50 usec  
 TE 300.7 K  
 D1 0.60000002 sec  
 D11 0.03000000 sec  
 TD0 1

==== CHANNEL f1 =====  
 NUC1 13C  
 P1 9.50 usec  
 PL1 -1.00 dB  
 PL1W -1.#IND0000 W  
 SFO1 125.7703643 MHz

==== CHANNEL f2 =====  
 CPDPRG2 waltz16  
 NUC2 1H  
 PCPD2 80.00 usec  
 PL2 0 dB  
 PL12 16.05 dB  
 PL13 17.00 dB  
 PL2W -1.#IND0000 W  
 PL12W -1.#IND0000 W  
 PL13W -1.#IND0000 W  
 SFO2 500.1320005 MHz

F2 - Processing parameters  
 SI 32768  
 SF 125.7577659 MHz  
 WDW EM  
 SSB 0  
 LB 1.00 Hz  
 GB 0  
 PC 1.40

Compound 30 <sup>13</sup>C-NMR
